# Supplementary material
Source: PubMed Central journal article supplement (PMC3339639)
Supplement: supp_en.2011-1783v1_EN-11-1783SuppTable_1.pdf [file supp_en.2011-1783v1_EN-11-1783SuppTable_1.pdf]

## Supplementary Table 1

| ↑arrows indicate significant changes relative to control (p<.05) | CORTEX | STRIATUM |
|------------------------------------------------------------------|--------|----------|
| <b>Cytokines</b>                                                 |        |          |
| IL-1 $\alpha$                                                    |        |          |
| IL-1 $\beta$                                                     |        | ↑        |
| IL-2                                                             | ↑      |          |
| IL-4                                                             |        |          |
| IL-10                                                            |        |          |
| GM-CSF                                                           |        |          |
| IFN- $\gamma$                                                    |        |          |
| IL-5                                                             | ↑      |          |
